# Supplementary material for: Feeding preferences and the effect of temperature on feeding rates of the graceful kelp crab, Pugettia gracilis
Source: PeerJ. 2023 Apr 21;11:e15223. doi: 10.7717/peerj.15223 (PMC10124544; doi:10.7717/peerj.15223)
Supplement: Supplemental Information 10 — All the information collected in both feeding preference and temperature experiments. [file peerj-11-15223-s010.xlsx]

## Sheet: Feeding Preference Data
Treatment	Crab Experiment Number	Crab ID (from Sup III)	Sex	Crab Mass (g)	Food	Initial Mass (g)	Final Mass (g)	Mass Change (g)	Control Change (g)	Control Adjusted Mass (g)	Grams of algal per grams of crab (Paper Metric)	Choice=both Nereo and Sargassum in the tank at the same time
NoChoice	1	1A	F	1.3	N. leutkeana	5.2	4.9	0.3	0	0.3	0.230769	No Choice=only Nereo or Sargassum in the tank
Choice	1	1A	F	1.3	N. leutkeana	5.8	5.3	0.5	0	0.5	0.384615
Choice	1	1A	F	1.3	S. muticum	5.3	4.8	0.5	0	0.5	0.384615
Choice	2	2A	M	4.4	N. leutkeana	6	5.4	0.6	0	0.6	0.136364
Choice	2	2A	M	4.4	S. muticum	7.1	7.1	0	-0.1	0.1	0.0227273
NoChoice	2	2A	M	4.4	N. leutkeana	5.3	3.7	1.6	0	1.6	0.363636
NoChoice	2	2A	M	4.4	S. muticum	5.8	4.9	0.9	0	0.9	0.204545
NoChoice	3	3A	M	5.8	N. leutkeana	4.8	4.5	0.3	0	0.3	0.0517241
NoChoice	3	3A	M	5.8	S. muticum	5.5	3.9	1.6	0	1.6	0.275862
Choice	4	4A	M	7.3	N. leutkeana	5.1	4	1.1	0	1.1	0.150685
Choice	4	4A	M	7.3	S. muticum	5.1	4.7	0.4	-0.1	0.5	0.0684932
NoChoice	4	4A	M	7.3	N. leutkeana	5.4	3.2	2.2	0	2.2	0.30137
NoChoice	4	4A	M	7.3	S. muticum	5.8	5.1	0.7	-0.1	0.8	0.109589
NoChoice	5	5A	F	3.4	S. muticum	5.5	4	1.5	0	1.5	0.441176
Choice	5	5A	F	3.4	N. leutkeana	6	5.4	0.6	0	0.6	0.176471
Choice	5	5A	F	3.4	S. muticum	5.5	5	0.5	-0.2	0.7	0.205882
NoChoice	5	5A	F	3.4	N. leutkeana	5.4	4	1.4	-0.1	1.5	0.441176
NoChoice	6	6A	M	1.9	S. muticum	5.1	4.6	0.5	0	0.5	0.263158
NoChoice	6	6A	M	1.9	N. leutkeana	5.2	4.4	0.8	0	0.8	0.421053
Choice	6	6A	M	1.9	N. leutkeana	5.7	5.2	0.5	0	0.5	0.263158
Choice	6	6A	M	1.9	S. muticum	5.2	4.8	0.4	0	0.4	0.210526
NoChoice	7	7A	F	2.7	S. muticum	5.5	5.2	0.3	0	0.3	0.111111
Choice	7	7A	F	2.7	N. leutkeana	5.9	5.7	0.2	0	0.2	0.0740741
Choice	7	7A	F	2.7	S. muticum	5.2	5.2	0	0	0	0
NoChoice	7	7A	F	2.7	N. leutkeana	5.1	4.2	0.9	-0.1	1	0.37037
Choice	8	8A	M	3.8	N. leutkeana	5.8	4.7	1.1	0	1.1	0.289474
Choice	8	8A	M	3.8	S. muticum	5.6	5.1	0.5	0	0.5	0.131579
NoChoice	8	8A	M	3.8	N. leutkeana	5.5	4.9	0.6	0	0.6	0.157895
NoChoice	8	8A	M	3.8	S. muticum	5.9	5	0.9	0	0.9	0.236842
Choice	9	9A	M	3.4	N. leutkeana	5.8	5.6	0.2	-0.1	0.3	0.0882353
Choice	9	9A	M	3.4	S. muticum	5.3	5	0.3	0	0.3	0.0882353
NoChoice	9	9A	M	3.4	S. muticum	5.4	4.4	1	0	1	0.294118
NoChoice	9	9A	M	3.4	N. leutkeana	5.1	4.8	0.3	0	0.3	0.0882353
NoChoice	10	10A	F	3.9	S. muticum	5.1	4.5	0.6	0	0.6	0.153846
NoChoice	10	10A	F	3.9	N. leutkeana	5.7	4.8	0.9	0	0.9	0.230769
Choice	10	10A	F	3.9	N. leutkeana	5.5	4.4	1.1	0	1.1	0.282051
Choice	10	10A	F	3.9	S. muticum	5.8	5.4	0.4	0	0.4	0.102564
NoChoice	11	11A	F	1.2	N. leutkeana	5.5	5.2	0.3	0	0.3	0.25
NoChoice	11	11A	F	1.2	S. muticum	5.7	5.6	0.1	0	0.1	0.0833333
Choice	11	11A	F	1.2	N. leutkeana	5.8	5.4	0.4	-0.1	0.5	0.416667
Choice	11	11A	F	1.2	S. muticum	5.9	5.4	0.5	0	0.5	0.416667
NoChoice	12	12A	F	2.5	S. muticum	5.8	5	0.8	0.1	0.7	0.28
Choice	12	12A	F	2.5	N. leutkeana	5.6	5.1	0.5	-0.1	0.6	0.24
Choice	12	12A	F	2.5	S. muticum	5.4	5.2	0.2	0.2	0	0
NoChoice	12	12A	F	2.5	N. leutkeana	5.9	5.4	0.5	0	0.5	0.2

## Sheet: Temperature Data
Date	Crab Experiment Number	Crab ID (from Sup IV)	Sex	Crab Mass (g)	Temp	Initial Mass (g)	Final Mass (g)	Mass Change (g)	Positive Change	Control Change (g)	Control Adjusted Mass (g)	Grams of algal per grams of crab (Paper Metric)
2020-11-19	13	1B	M	1.8	Ambient	10.19	10.188	-0.002	0.002	-0.001	0.003	0.00166667
2020-11-19	14	2B	M	3	Ambient	9.025	8.201	-0.824	0.824	-0.267	1.091	0.363667
2020-11-19	15	3B	M	2.3	Elevated	9.663	7.584	-2.079	2.079	-0.298	2.377	1.03348
2020-11-22	17	4B	M	2.2	Ambient	4.428	4.667	0.239	-0.239	0.21	-0.449	-0.204091
2020-11-22	18	5B	M	2.7	Elevated	4.708	4.47	-0.238	0.238	-0.321	0.559	0.207037
2020-11-25	19	6B	F	2.8	Ambient	7.228	6.948	-0.28	0.28	-0.175	0.455	0.1625
2020-12-02	24	7B	M	3.4	Ambient	10.35	9.375	-0.975	0.975	-0.066	1.041	0.306176
2020-12-05	27	8B	M	3.7	Ambient	12.24	12.405	0.165	-0.165	-0.106	-0.059	-0.0159459
2020-12-05	28	9B	M	4.8	Elevated	9.466	7.349	-2.117	2.117	-1.812	3.929	0.818542
2021-02-02	32	10B	M	4.6	Ambient	7.586	7.378	-0.208	0.208	-0.339	0.547	0.118913
2021-02-02	33	11B	M	3.1	Elevated	8.79	8.291	-0.499	0.499	-0.471	0.97	0.312903
2021-02-05	34	12B	M	3.6	Ambient	5.692	5.403	-0.289	0.289	0.181	0.108	0.03
2021-02-05	35	13B	M	3	Ambient	4.633	4.156	-0.477	0.477	-0.372	0.849	0.283
2021-02-05	36	14B	F	3.2	Elevated	6.406	4.276	-2.13	2.13	-0.884	3.014	0.941875
2021-02-08	38	15B	M	2.3	Ambient	5.467	4.89	-0.577	0.577	-0.275	0.852	0.370435
2021-02-11	40	16B	M	2.2	Ambient	4.888	4.583	-0.305	0.305	-0.009	0.314	0.142727
2021-02-11	41	17B	F	5.8	Ambient	5.11	5.088	-0.022	0.022	-0.564	0.586	0.101034
2012-02-11	42	18B	M	5.6	Elevated	4.606	4.601	-0.005	0.005	-0.777	0.782	0.139643
